# Supplementary material for: Femtosecond Laser Fabrication of High-Linearity Liquid Metal-Based Flexible Strain Sensor
Source: MDPI journal article supplement (doi:10.3390/ma17091979), 2024-04-24
Supplement: s1 [file s1]

Supplementary Materials for

**Femtosecond Laser Fabrication of High-Linearity  
Liquid Metal-Based Flexible Strain Sensor**

Cheng Li<sup>1</sup>, Chengjun Zhang<sup>2</sup>, Haoyu Li<sup>1</sup>, Zexiang Luo<sup>1</sup>, Yuanchen Zhang<sup>1</sup>, Xun Hou<sup>1</sup>, Qing Yang<sup>2</sup>  
and Feng Chen<sup>1,\*</sup>

<sup>1</sup>*State Key Laboratory for Manufacturing System Engineering and Shaanxi Key Laboratory of Photonics Technology for Information, School of Electronic Science and Engineering, Xi'an Jiaotong University, Xi'an 710049, China*

<sup>2</sup>*School of Instrument Science and Technology, Xi'an Jiaotong University, Xi'an 710049, China*

\*Correspondence: chenfeng@mail.xjtu.edu.cn

**This PDF file includes:**

Figures S1 to S4

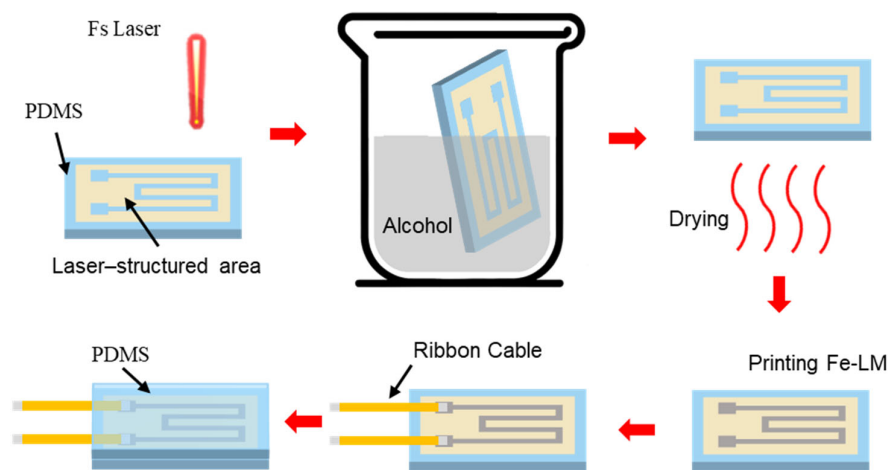

**Figure S1.** Preparation of the strain sensor.

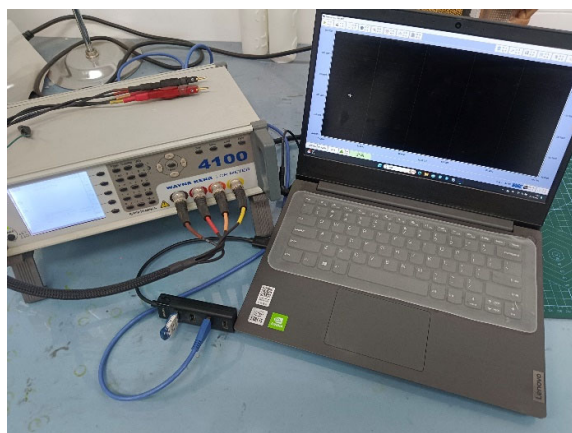

**Figure S2.** A WK4100 LCR meter.

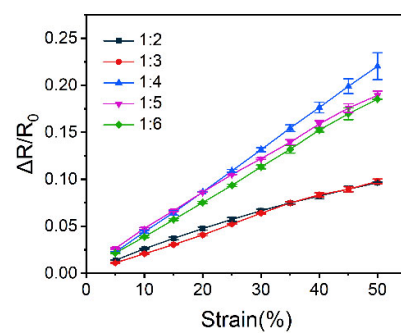

**Figure S3.** Resistance change of different weight ratios of Fe-LM.

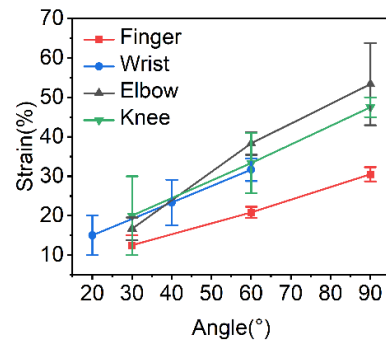

**Figure S4.** The strain of the sensor at different positions as a function of angle.
